# Supplementary material for: Heat stress compromises epithelial integrity in the coral, Acropora hyacinthus
Source: PeerJ. 2019 Feb 26;7:e6510. doi: 10.7717/peerj.6510 (PMC6396749; doi:10.7717/peerj.6510)
Supplement: Table S1 [file peerj-07-6510-s001.xlsx]

## Sheet: Sheet1
Experiment		Day1-5hrs	Day2-5hrs	Day1-5hrs	Day1-5hrs	Day1-5hrs	Day2-5hrs	Day1-5hrs	Day1-5hrs	Day1-5hrs	Day1-5hrs	Day1-5hrs
Sample Name		85-300-c	28-400-c	85-300-h	102-400-h	27-300-h	83-400-h	70-300-h	87-400-h	87-300-h	83-300-h	6-300-h
Colony ID		85	28	85	102	27	83	70	87	87	83	6
Origin		HV	MV	HV	MV	HV	HV	MV	HV	HV	HV	HV
Location		HV	MV	HV	MV	HV	MV	HV	MV	HV	HV	HV
Symbiont D %		33	71	33	56	94	84	64	93	93	84	98
Symbiont C %		67	29	67	44	6	16	36	7	7	16	2
Treatment		control	control	heated	heated	heated	heated	heated	heated	heated	heated	heated
treatment		c	c	h	h	h	h	h	h	h	h	h
timing		5	5	5	5	5	5	5	5	5	5	5
Colony		85	28	85	10	27	83	70	87	87	83	6
Visual Bleaching Score		1	1	3	1	3	2	2	3	3	3	1
