# Supplementary material for: Heat stress compromises epithelial integrity in the coral, Acropora hyacinthus
Source: PeerJ. 2019 Feb 26;7:e6510. doi: 10.7717/peerj.6510 (PMC6396749; doi:10.7717/peerj.6510)
Supplement: Table S2 [file peerj-07-6510-s002.xlsx]

## Sheet: Sheet1
ORGANISM	SEQUENCE ID	SOURCE	REFERENCE
Acropora digitifera	adi_v1.14912	http://marinegenomics.oist.jp/	Shinzato et al, 2011
Acropora digitifera	adi_v1.18554	http://marinegenomics.oist.jp/	Shinzato et al, 2011
Exaiptasia	AIPGENE8442	http://aiptasia.reefgenomics.org/	Baumgarten et al, 2015
Exaiptasia	AIPGENE16647	http://aiptasia.reefgenomics.org/	Baumgarten et al, 2015
Exaiptasia	APIGENE8597	http://aiptasia.reefgenomics.org/	Baumgarten et al, 2015
Edwardisella	El.T1.1774.4	http://cnidarians.bu.edu/EdwardBase/cgi-bin/index.cgi	Stefanik et al, 2014
Amplexidiscus fenestrafer	evm.model.scaffold_110.1	http://corallimorpharia.reefgenomics.org/	Wang et al, 2017
Amplexidiscus fenestrafer	evm.model.scaffold_2.61	http://corallimorpharia.reefgenomics.org/	Wang et al, 2017
Amplexidiscus fenestrafer	evm.model.scaffold_201.2	http://corallimorpharia.reefgenomics.org/	Wang et al, 2017
Amplexidiscus fenestrafer	evm.model.scaffold_23.121	http://corallimorpharia.reefgenomics.org/	Wang et al, 2017
Hydra vulgaris	XP_002167163	NCBI	NA
Nematostella vectensis	jgi_Nemve1_231729_fgsh_est.C_scaffold_2000015	JGI	Traylor-Knowles et al, 2010
Nematostella vectensis	estExt_GenewiseH_1.C_1380090	JGI	Traylor-Knowles et al, 2010
Nematostella vectensis	jgi_Nemve1_95157_e_gw.38.94.1	JGI	Traylor-Knowles et al, 2010
Pocillopora damicornis	bu_91849.1_c29681	http://cnidarians.bu.edu/PocilloporaBase/cgi-bin/index.cgi	Traylor-Knowles et al, 2011
Pocillopora damicornis	bu_91849.1_c6523	http://cnidarians.bu.edu/PocilloporaBase/cgi-bin/index.cgi	Traylor-Knowles et al, 2011
Porites lutea	plut2.m8.11784.m1	http://reefgenomics.org/	Liew et al, 2016
Porites lutea	plut2.m8.2503.m1	http://reefgenomics.org/	Liew et al, 2016
Porites lutea	plut2.m8.3173.m1	http://reefgenomics.org/	Liew et al, 2016
Stylophora pistillata	Spis11913 SpisGene11913	http://reefgenomics.org/	Liew et al, 2016
Stylophora pistillata	Spis2716 SpisGene2716	http://reefgenomics.org/	Liew et al, 2016
Stylophora pistillata	Spis8638 SpisGene8638	http://reefgenomics.org/	Liew et al, 2016
