# Supplementary material for: Heat stress compromises epithelial integrity in the coral, Acropora hyacinthus
Source: PeerJ. 2019 Feb 26;7:e6510. doi: 10.7717/peerj.6510 (PMC6396749; doi:10.7717/peerj.6510)
Supplement: Table S3 [file peerj-07-6510-s003.xlsx]

## Sheet: Sheet1
CONTIG	GENE	PRIMER ORIENTATION	PRIMER SEQUENCE	CLONED SEQUENCE	SEQUENCE ORIENTATION
contig74205	Grainyhead	FWD	CGGACGATTCCTTAGTTGTGAA	CGGACGATTCCTTAGTTGTGAAGAGTGTCTGACAGAATATAGTCATAGAAATCGCGTGAGATTGTGTTGATATTTTGCGGCAACTTCTCAGTTATACTTCTCGGTCGTTTCTTAGAGCGACGGCTATTGCCGTATTTCGCTTGGTTTGTTCTCCTTTGCGAGTCAAAAGACGGGTACTGGAATTTGGACTTGGGCTGCTGGGAGTCCTCANTGAATGGATATGGTCGTCAAGATTATGGATGCAGGAGTTCCCNNTCNANNTGCTCT	3+
contig74205	Grainyhead	REV	GCCTCAGTAACGGAGTAGAGTA
